# Supplementary material for: Single-cell Transcriptome Analysis Uncovers Heterogeneity and Key Regulators in Ibrutinib-resistant Chronic Lymphocytic Leukemia
Source: Research Square preprint supplement (doi:10.21203/rs.3.rs-998561/v1), 2021-11-08
Supplement: Supplementary file 1 [file 1a8d08f6e30891786f9bbf2a.xlsx]

## Sheet: STable13
ID	S1	S2	S3	S4	R1	R2	R3
Gender	Male	Female	Male	Male	Male	Male	Male
Age	52	68	60	58	62.8	40.7507	41
Rai/Binet stage	2B	1A	1A	2B	4C	4C	4C
IGHV mutation	No	Yes	Yes	No	No	No	No
TP53 Abnormality	No	No	No	No	Yes	Yes	Yes
ATM del	No	No	No	Yes	No	Yes	No
13q-	NA	No	Yes	NA	Yes	Yes	No
6q-	NA	No	NA	NA	0	Yes	Yes
+12	NA	No	NA	No	No	No	No
11q-	Yes	NA	NA	Yes	NA	Yes	NA
17p-	Yes	NA	NA	NA	NA	NA	NA
chromosome karyotype	45,XY,der(4;17)(q10;q10)[9]/46,XY[1]	46,XX[20]	46,XY[3]	46,XY,der(11)(q22)[8]/46,XY[2]	NA	44-46,XY,del(6)(q23),del(11)(q24),del(13)(q14),der(17),18p+,-20,+mar[cp9]/46,XY[1]	NA
β2-MG(mg/L)	2.8	2.37	2.14	3.51	2.49	3.45	3.9
NGS	No abnormalities	CREBBP mut	No abnormalities	No abnormalities	TP53(R273H:82.01%)	TP53(R282W:91.45%);FAT1(G1961S:14.05%)	TP53 mut, ASXL1 mut; PD: EGR2(E356K:22.15%);TP53(V272E:14.18%);BTK(C481R：20.54%)
TTT (month)	49	NR	NR	2	16	1	4
PFS (month)	NR	NR	NR	NR	32	13	12
OS (month)	NR, survival	NR, survival	NR, survival	NR, survival	NR, survival	71	26
Note
